# Supplementary material for: The Disdrometer Verification Network (DiVeN): a UK network of laser precipitation instruments
Source: Copernicus journal article supplement (doi:10.5194/amt-2018-302), 2018-10-17
Supplement: Supplementary file [file amt-2018-302-AC2-supplement.pdf]

Interactive discussion for **amt-2018-302**:

## **The Disdrometer Verification Network (DiVeN): a UK network of laser precipitation instruments**

### **Response to Reviewer 2**

The authors thank the reviewer for their time and consideration given to this manuscript.

The reviewer's comments have been listed below in **bold** and responded to individually in *red italics*.

#### **\* General comments:**

**The authors described and reported on the performance of a disdrometer network in the UK. I have found the work well written and without significant scientific flaws, as well as being of interest to precipitation researchers. For these reasons, I recommend publication after minor modifications.**

#### **\* Specific comments**

**1) Page 3, line 22: "As of the time of writing this publication, operational networks of disdrometers are uncommon". This may be true of optical disdrometer, but radar-based units have been used operationally for example in Canada to determine precipitation type from the early 1990s to about 2010 on all automatic stations. See <https://journals.ametsoc.org/doi/full/10.1175/2007JTECHA957.1> and references therein.**

*The authors thank the reviewer for pointing this out and have added this to the paper as quoted below:*

*"As of the time of writing this publication, operational networks of disdrometers are uncommon, with the notable exceptions of Canada (Sheppard, 1990) and*

*Germany. Networks of disdrometers solely for research purposes have been frequently deployed for short periods of time.”*

**2) Page 4, line 32, or somewhere else: What is the quantitative meaning of the quality index? For example, what does an index of 90% mean, beyond being better than one of 80% and worse than 95%?**

*The manufacturers describe the quality index as an ‘estimation’ which has many inputs and again the details are not provided in the instrument manual. Through personal communication the manufacturer mentions the number of particles in each bin and the overlap between the empirical relationships used (which are not provided) in the determination of this index. The manufacturer then goes on to dismiss the usefulness of the index in personal communication, listed below. However, the case studies in the paper show that it has some ability to show when the Present Weather code assignment is less confident e.g. in Figure 13 and especially in Figure 8 where mixed phase present weather codes have reduced quality index.*

*The manufacturers supplied the following, in a personal communication on 20 Sep 2017: (Manufacturer comments in blue italics)*

*1: Is there a function or equation you can give me to show how measuring quality is calculated?*

*1: We do not issue this info. Reason:*

*The quality of the measurement results can only be estimated by the LPM disdrometer by means of the number of particles measured in the individual internal range classes and the ambient temperature. Further influences of the quality are to be expected with corresponding wind speeds (depending on the type of precipitation type) and with very dense fog (+ light wind).*

*Conclusion: in our opinion it makes no sense to use this estimated value without further consideration of the environmental conditions.*

*2. How many hydrometeors are required to get 100%? For “no precipitation” how many are required for 100% accuracy?*

*2. REMARK: it’s only “our” ESTIMATION:*

*Example Hail: 2 particles ~ 50%*

*5 particles ~ 100%*

*Example No Precipitation 100%: max. 5 Drizzle-Particles*

*3. Does the disdrometer record the second highest probability class? E.g. if Snow is 87% and rain is 65%, can I see that, or does it just output the highest probability?*

*3. Prec-type classification is done according the WMO-codes.*

*E.g. if Rain and Snow is detected, the code 68(Rain AND Snow) is taken.*

*The so-called “measuring quality” value is not taken for this classification.*

*4. Can you tell me which speed/diameter bin is classified as each precipitation type? Where is the scientific evidence that those choices are correct? Is there an uncertainty on those classes?*

*4. For drizzle and rain we use the gunn-kinzer relation. The diameter/fall speed relation of hydrometeors are well measured, there are many scientific publications available. However, there are overlaps between some types of precipitation that lead to uncertainties in the measuring principle of this sensor.*

**3) Page 6, lines 9-11 : Given the simplicity of your assumptions (all drops measure 0.8 mm), I would reduce the reported accuracy of your probability of simultaneous occurrence to a single digit of precision, i.e., 0.09% and 7%. And at 0.8 mm, these are drops, not “droplets” (line 6).**

*This has been corrected in the text.*

**4) To what extent do you need Sections 3.2 and 3.3? I'll leave it to you to decide.**

*The authors wish to keep these technical details. The low-cost installation and continued low running costs of DiVeN are key aspect of its' success, and the network would not be possible were the costs higher. There has also been considerable attention within the atmospheric science community about “low cost” sensors and we hope to contribute to*

*this larger discussion. The authors leave the decision of the applicability of this material in an AMTD article to the Handling Associate Editor.*

**5) Page 11, line 26-27: “[The Doris event] will be a valuable case by which to compare the performance of radar hydrometeor classification schemes.”. Yes and no: It depends on the altitude of radar measurements compared to your ground-level measurements. In such events, if melting occurs at too low altitude, the radar may be blind to it. There are hence two aspects to HCA performance: Accuracy at altitude, and representativeness of the assessment at altitude to surface conditions, both of which being two very different research projects.**

*The authors appreciate the comment made and will consider it going forward in future research which is primarily on the radar-derived surface hydrometeor type products. The text has been changed to specify radar-derived surface hydrometeor type products only.*

**6) Page 12, line 20, on the effect of wind: A strong surface wind would also often create strong surface turbulence that may affect drop vertical velocity in addition to worsening edge effects.**

*“The fall speed of hydrometeors measured by the disdrometer may be affected by the wind, in particular winds tangent to the disdrometer as was the case here (N-S oriented beam, westerly wind).”*

*changed to:*

*“A strong surface wind is associated with turbulent eddies which have some vertical component. The intermittent vertical wind acts to widen the drop velocity distribution. Furthermore, turbulence breaks up droplets thus skewing the drop size distribution. Finally, winds tangent to the beam (N-S oriented beam, westerly wind) as was the case here, increase the number of beam-edge hits which reduce the quality of the data.”*

**\* Technical corrections, typos, etc :**

**Page 5, line 4: Section 44.1 -> Section 4.1**

*This has been corrected in the text.*

**Page 5, line 30: 0.5 mm snow aggregate -> 0.5 mm ice crystal**

*This has been corrected in the text.*

**Page 6, line 13: Section 44.2 -> Section 4.2**

*This has been corrected in the text.*

**Page 11, line 26: its' -> its**

*This has been corrected in the text.*

**Page 12, line 10: Waldvögel -> Waldvogel**

*This has been corrected in the text.*

**Table 3 title: Disrometer -> Disdrometer**

*This has been corrected in the text.*

**Figure 13: Can you fix the alignment problem between the line plots (reporting on the minute mark) and the hydrometeor determination graphics (plotted in between the minute marks)?**

*The line plots on Figure 13 have been shifted forward by 30 seconds to indicate that a single point is valid across the minute labelled, thereby following the notation of the hydrometeor determination plot.*

Interactive discussion for amt-2018-302:

# The Disdrometer Verification Network (DiVeN): a UK network of laser precipitation instruments

Tracked changes to LaTeX file:

The screenshot shows a LaTeX editor interface with a top navigation bar containing 'Menu', 'Ab Review', 'Share', 'Submit', 'History', and 'Chat'. The main editor area is split into two panes: 'Source' and 'Rich Text'. The 'Source' pane displays a list of journal abbreviations and their corresponding LaTeX commands, with red squiggly lines indicating tracked changes. The 'Rich Text' pane is currently empty. The tracked changes include:

- Line 1: Copernicus Publications Manuscript Preparation Template for LaTeX Submissions
- Line 3: This template should be used for copernicus.cls
- Line 4: The class file and some style files are bundled in the Copernicus Latex Package, which can be downloaded from the different journal webpages.
- Line 5: For further assistance please contact Copernicus Publications at: production@copernicus.org
- Line 6: https://publications.copernicus.org/for\_authors/manuscript\_preparation.html
- Line 9: Please use the following documentclass and journal abbreviations for discussion papers and final revised papers.
- Line 11: 2-column papers and discussion papers
- Line 12: \documentclass[amt, manuscript]{copernicus}
- Line 16: Journal abbreviations (please use the same for discussion papers and final revised papers)
- Line 19: Advances in Geosciences (adgeo)
- Line 20: Advances in Radio Science (ars)
- Line 21: Advances in Science and Research (asr)
- Line 22: Advances in Statistical Climatology, Meteorology and Oceanography (ascmo)
- Line 23: Annales Geophysicae (angeo)
- Line 24: Archives Animal Breeding (aab)
- Line 25: ASTRA Proceedings (ap)
- Line 26: Atmospheric Chemistry and Physics (acp)
- Line 27: Atmospheric Measurement Techniques (amt)
- Line 28: Biogeosciences (bg)
- Line 29: Climate of the Past (cp)
- Line 30: Drinking Water Engineering and Science (dwes)
- Line 31: Earth Surface Dynamics (esurf)
- Line 32: Earth System Dynamics (esd)
- Line 33: Earth System Science Data (essd)
- Line 34: E&G Quaternary Science Journal (egqsj)
- Line 35: Fossil Record (fr)
- Line 36: Geographica Helvetica (gh)
- Line 37: Geoscience Communication (gc)
- Line 38: Geoscientific Instrumentation, Methods and Data Systems (gi)
- Line 39: Geoscientific Model Development (gmd)
- Line 40: History of Geo- and Space Sciences (hgss)
- Line 41: Hydrology and Earth System Sciences (hess)
- Line 42: Journal of Micropalaeontology (jm)
- Line 43: Journal of Sensors and Sensor Systems (jsss)
- Line 44: Mechanical Sciences (ms)
- Line 45: Natural Hazards and Earth System Sciences (nhess)
- Line 46: Nonlinear Processes in Geophysics (npg)
- Line 47: Ocean Science (os)
- Line 48: Primate Biology (pb)
- Line 49: Proceedings of the International Association of Hydrological Sciences (piahs)
- Line 50: Scientific Drilling (sd)
- Line 51: SOIL (soil)
- Line 52: Solid Earth (se)
- Line 53: The Cryosphere (tc)
- Line 54: Web Ecology (we)
- Line 55: Wind Energy Science (wes)
- Line 58: \usepackage commands included in the copernicus.cls:
- Line 59: \usepackage[german, english]{babel}
- Line 60: \usepackage{tabularx}
- Line 61: \usepackage{cancel}
- Line 62: \usepackage{multirow}
- Line 63: \usepackage{supertabular}
- Line 64: \usepackage{algorithmic}
- Line 65: \usepackage{algorithm}
- Line 66: \usepackage{amsthm}
- Line 67: \usepackage{float}
- Line 68: \usepackage{subfig}
- Line 69: \usepackage{rotating}

```

72 - \begin{document}
73
74 \title{The Disdrometer Verification Network (DiVeN): a UK network of laser precipitation instruments}
75
76
77 % \Author[affil]{given_name}{surname}
78
79 \Author[1]{Ben S.}{Pickering}
80 \Author[2]{Ryan R.}{Neely III}
81 \Author[3]{Dawn}{Harrison}
82
83 \affil[1]{Institute for Climate and Atmospheric Science, School of Earth and Environment, University of Leeds, Leeds, Yorkshire, UK. LS2 9JT}
84 \affil[2]{National Centre for Atmospheric Science, 71-75 Clarendon Rd, Leeds, Yorkshire, UK. LS2 9PH}
85 \affil[3]{United Kingdom Meteorological Office, Fitzroy Rd, Exeter, UK. EX1 3PB}
86
87 %% The [] brackets identify the author with the corresponding affiliation. 1, 2, 3, etc. should be inserted.
88
89
90
91 \runningtitle{TEXT}
92
93 \runningauthor{TEXT}
94
95 \correspondence{Ben S. Pickering (eebp@leeds.ac.uk)}
96
97
98
99 \received{never}
100 \pubdiscuss{} %% only important for two-stage journals
101 \revised{}
102 \accepted{}
103 \published{}
104
105 %% These dates will be inserted by Copernicus Publications during the typesetting process.
106
107
108 \firstpage{1}
109
110 \maketitle
111
112
113
114 - \begin{abstract}
115 Starting in February 2017, a network of 14 Thies Laser Precipitation Monitors (LPMs) were installed at various locations around the United Kingdom to create the Disdrometer Verification Network (DiVeN). The instruments were installed for verification of radar hydrometeor classification algorithms but are valuable for much wider use in the scientific and operational meteorological community. Every Thies LPM is able to designate each observed hydrometeor into one of 20 diameter bins from  $\geq 0.125$  mm to  $> 8$  mm, and one of 22 speed bins from  $> 0.0$  m s-1 to  $> 20.0$  m s-1. Using empirically-derived relationships, the instrument classifies precipitation into one of 11 possible hydrometeor classes in the form of a present weather code, with an associated indicator of uncertainty. To provide immediate feedback to data users, the observations are plotted in near real time (NRT) and made publicly available on a website within 7 minutes. Here we describe the Disdrometer Verification Network and present specific cases from the first year of observations. Cases show here suggest that the Thies LPM performs well at identifying transitions between rain and snow, but struggles with detection of graupel and pristine ice crystals (which occur infrequently in the United Kingdom) inherently, due to internal processing. The present weather code quality index is shown to have some skill without the supplementary sensors recommended by the manufacturer. Overall the Thies LPM is a useful tool for detecting hydrometeor type at the surface and DiVeN provides a novel dataset not previously observed for the United Kingdom.
116 \end{abstract}
117
118
119 \copyrightstatement{© Author(s) 2018. This work is distributed under the Creative Commons Attribution 4.0 License.}
120
121
122 %%%%%%%%%%%%%%%%%%%%%%%%%%%%%%%%%%%%%%%%%%%%%%%%%%%%%%%%%%%%%%%%%%%%%%%%%
123 % MAIN BODY OF PAPER
124 %%%%%%%%%%%%%%%%%%%%%%%%%%%%%%%%%%%%%%%%%%%%%%%%%%%%%%%%%%%%%%%%%%%%%%%%%
125
126 \introduction
127 Precipitation in all its various forms is one of the most important meteorological variables. In the UK, severe precipitation events cause millions of pounds worth of damage every year (cite{Thornes1992, Penning2006, Muchan2015}). The phase of precipitation is also important. In winter, limited resources such as flood defenses, plows and grit will be allocated differently based on forecasts of hydrometeor type (cite{Elmore2015, Gascon2018}) and references therein). Accurate observations and forecasts of precipitation amount and type are therefore essential.
128
129
130 - \subsection{Motivation for DiVeN}
131 Observations of precipitation are traditionally conducted with networks of tipping bucket rain gauges (henceforth TBRs) such as the UK Met Office network described in (cite{Green2010}). TBR gauges funnel precipitation into a bucket which tips and empties when a threshold volume is reached. The threshold volume is typically equivalent to 0.2 mm depth of rainfall, which means the TBR has a coarse resolution and struggles to measure low rainfall rates over short intervals. For example, a rain rate of 2.4 mm hr-1 would only tip a TBR once every 5 minutes. Moreover, TBRs cannot detect hydrometeor type; only the liquid equivalent when the solid hydrometeors in the funnel melt naturally or from a heating element. Even liquid precipitation is poorly measured by TBRs. (cite{Ciach2003}) analysed 15 collocated TBRs and showed that considerable errors occur between the instruments, inconsistent across time and intensity scales. Finally, TBRs are easily blocked by debris and bird droppings, and the airflow around the instrument has been shown to influence the measurement (cite{Groisman1994}).
132
133 weather radar can observe a large area at high spatial and temporal resolution. Since 1979 the United Kingdom Meteorological Office has operated and maintained a network of weather radars at C-band frequency (5.60-5.65 GHz) which, as of March 2018, consists of 15 radars. 5-min frequency volume data from each radar is quality controlled and corrected before an estimate of surface precipitation rate is derived. Surface precipitation rate estimates from each radar are then composited into a 1 km resolution product (cite{Harrison2000}).
134
135 The first operational weather radars only observed a single polarisation (cite{fabry_2015}). An issue with single-polarisation weather radar is that it only provides the radar reflectivity factor for the sample volume. Deriving an accurate quantitative estimate of the equivalent rainfall rate from radar reflectivity factor requires additional knowledge about the size distribution and type of hydrometeors being observed.
136
137 Dual-polarimetric weather radars are better able to estimate the type of hydrometeor within a sample volume. Thus, variables derived from the dual-polarimetric returns provide information about the shape, orientation, oscillation and homogeneity of observed particles (cite{Seigal1978, Hall1984, Chandrasekar1990}). This information may be used to infer the hydrometeor type through hydrometeor classification algorithms (HCAs). HCAs combine observed polarimetric variables using prior knowledge of typical values for each hydrometeor type, to identify the most likely hydrometeor species within a sample volume (cite{Liu2000}). (cite{Chandrasekar2013}) gives an overview of recent work on HCAs.
138

```

Changed **subjectively dise...**  
(show all) to present  
Apr 8, 2019 5:05 PM • You

✖ Reject  Accept

---

Changed **presented to shown**  
Apr 8, 2019 5:05 PM • You

✖ Reject  Accept

---

Changed **Precipitation Mea...**  
(show all) to Motivation for Di...  
(show all)  
Apr 8, 2019 5:27 PM • You

✖ Reject  Accept

---

Deleted **(defined as moderate by the WMO)**  
Apr 8, 2019 4:07 PM • You

Ab ✖ Reject  Accept

---

Changed **precipitation to hydrometeor**  
Apr 8, 2019 4:01 PM • You

✖ Reject  Accept

---

Deleted **Doppler**  
Apr 8, 2019 4:05 PM • You

Ab ✖ Reject  Accept

---

Deleted **and Doppler velocity**  
Apr 8, 2019 4:05 PM • You

Ab ✖ Reject  Accept

---

Deleted **composition**  
Mar 30, 2019 1:01 PM • You

Ab ✖ Reject  Accept



139 Starting in mid-2012 and completing early-2018, every radar in the UK Met Office network was upgraded from single to dual-polarisation using in-house design and off-the-shelf components, re-using the pedestal and reflector from the original radar systems. To take advantage of the new information and to improve precipitation estimates, an operational HCA was developed within the Met Office, based on work at M<sup>et</sup> France [\cite{Al-Sakka2013}](#). While significant amounts of literature have been published on the technical improvement of HCAs [\cite{Chandrasekar2013}](#), the verification of HCA skill has not been discussed as widely. There is a need for more rigorous validation of HCAs and DiVen was created specifically for the verification of the UK Met Office radar network HCA.

140

141 Typically in-situ aircraft are used to verify radar HCA [\cite{Liu2000,Lim2005,Ribaud2016}](#). Instrumented aircraft flights such as the Facility for Airborne Atmospheric Measurements (FAAM) take a swath volume using 20 Hz photographic disdrometer instruments [\cite{abel2014}](#). However there is no fall speed information, which distinguishes hydrometeor type with high skill due to distinct particle density differences [\cite{locatelli1974}](#). The lack of fall speed information on FAAM instruments means that the 1,200 images collected in every minute of flight must be visually analysed manually or with complex image recognition algorithms. The major disadvantage with FAAM data is the sparsity of cases due to the expense of operating the aircraft.

142

143 Therefore, in-situ surface observations must be utilised to expand the quantity of comparison data. A larger dataset allows bulk verification statistics to be performed on radar HCAs. Here we introduce a new surface hydrometeor type dataset and examine the skill of the dataset, independently of any radar instruments.

144

145

146

147 [\subsection{Precipitation Measurement with Disdrometers}](#)

148 A disdrometer is an instrument which measures the drop size distribution of precipitation over time. The drop size distribution (henceforth DSD) of precipitation is the function of drop size and drop frequency. [\cite{Jameson2001}](#) provides an in-depth discussion on the definition of a DSD. Disdrometers typically record drop sizes into bins of nonlinearly increasing widths due to the accuracy reducing with increasing values.

149

150 The disdrometer is also a useful tool for verifying radar hydrometeor classification algorithms. Hydrometeor type can be empirically derived using information about the diameter and fall speed of the particle, which the Thies Laser Precipitation Monitor (LPM) instrument used in DiVen is able to measure. The Gunn-Kinzer curve [\cite{Gunn1949}](#) describes the relationship between raindrop diameter and fall speed. As diameter increases, the velocity of a raindrop increases asymptotically. Other velocity-diameter relations have been shown in the literature for snow, hail, and graupel which are well described in [\cite{locatelli1974}](#).

151

152 As of the time of writing this publication, operational networks of disdrometers are uncommon, with the notable exceptions of Canada [\cite{sheppard1990}](#) and Germany. Networks of disdrometers solely for research purposes have been frequently deployed for short periods of time. From March 2009 to July 2010 (16 months), 16 disdrometers were placed on rooftops within a 1 km by 1 km on the campus of the Swiss Federal Institute of Technology in Lausanne to study the inter-radar pixel variability in rainfall [\cite{Jaffrain2011}](#). Another example of research using networked disdrometers is the Midlatitude Continental Convective Clouds Experiment (MC3E) [\cite{jensen2016}](#) which utilised 18 Parsivel-1 disdrometers and 7 2DVDs (2-Dimensional Video Disdrometers) within a 6 km radius of a central facility near Ponca City, Oklahoma. The project lasted for six weeks (22 April through 6 June 2011). DiVen has an initial deployment phase of 3 years with a high expectation of renewal, which enables unique long-term research to be conducted with the data.

153

154

155

156 [\subsection{Paper Structure}](#)

157 This paper describes DiVen and demonstrates the data products of the Thies LPM instruments being used. The first part of the paper provides a technical description of the disdrometer instruments used in the network, the locations chosen to host the instruments, and data management in the network. Case studies from the first 12 months of DiVen observations are then discussed. The case studies include rain-snow transitions in the 2017 named winter storm Doris, a convective rainfall event, and graupel observations. These events will provide an illustrative analysis of the observations being produced by all the individual disdrometer instruments within DiVen. Enhanced scrutiny will be placed on the performance of the present weather code because this variable will be used to verify the Met Office radar HCAs.

158

159

160

161 [\section{Thies Clima Laser Precipitation Monitor}\label{instrument}](#)

162

163 [\subsection{Specification}\label{spec}](#)

164 The instruments used in DiVen (see Figure [\ref{fig:weybourne}](#)) are the Thies [\texttrademark](#) Laser Precipitation Monitor (LPM), model number 5.4110.00.200, which are described in detail in [\cite{Thies2011}](#). To make observations the instrument utilises an infrared (785 nm) beam with dimensions 228 mm x 20 mm x 0.75mm, a total horizontal area of 45.6cm<sup>2</sup>. The infrared beam is emitted from one end of the instrument and is directed to the other. A photo-diode and signal processor determine the optical characteristics including optical intensity which is reduced as a particle falls through the beam. The diameter of the hydrometeor is inferred by the maximum amplitude of the signal reduction and the speed of the hydrometeor is estimated by the duration of the signal reduction. Figure 1 in [\cite{Loffler-Mang2000}](#) describes a similar instrument (Parsivel-1) with the same observing principle and is an excellent visualisation of the technique which is employed by the Thies LPM. The signal processing claims to detect and remove particles that fall on the edge of the beam: "The measured values are processed by a signal processor (DSP), and checked for plausibility (e.g. edge hits)." No further details are given by the manufacturer. The instrument is able to allocate individual hydrometeors into 20 diameter bins from 0.125 mm to  $\geq 8$  mm, and 22 speed bins from  $\geq 0.2$  m s<sup>-1</sup> to  $\geq 20$  m s<sup>-1</sup>.

165

166 The Thies disdrometer performs additional calculations on the incoming data which it attaches to the Telegram 4 serial output. Table [\ref{Tab:var}](#) provides details of the variables and the range of possible values that the instrument is capable of recording. The quantity, intensity, and type of precipitation (drizzle, rain, snow, ice, grains, soft hail, hail as well as combinations of multiple types) are calculated. Hydrometeor type is recorded as a present weather code. Table [\ref{Tab:pw\\_codes}](#) lists all of the WMO Tab. 4680 present weather codes that the Thies Laser Precipitation Monitor is capable of recording. The present weather code is encoded as a number between 1--99 which has a corresponding description of the weather using the standardised codes from the World Meteorological Organization Table 4680 [\cite{WMO1988}](#). The present weather descriptors cover most hydrometeor types but not all; graupel is not explicitly mentioned, for example.

167

168 Hydrometeor type is inferred by the instrument, using empirical relationships between hydrometeor size and fall speed. The diameter--fall speed relation described in [\cite{Gunn1949}](#) is the only relationship cited in the instrument manual but it is expected that further relationships are used for solid precipitation, undisclosed by the manufacturer. Section [\ref{case\\_studies}](#) of this paper will qualitatively test the skill of the present weather code regardless of the algorithm it uses, since the exact method of derivation is not known.

169

170 Lastly, the present weather code quality index (Table [\ref{Tab:var}](#)) is calculated based on the number of particles within each hydrometeor class. Thies do not recommend using the quality index without additional temperature and wind sensors which can be added to the disdrometer (personal communication with Marc Hillebrecht, Adolf Thies GMBH & CO. KG, 20 Sep 2017). Although DiVen does not employ the additional sensors, the quality index is still published and can be a useful indicator as shown in Section [\ref{doris}](#).

171

172

173

174 [\subsection{Limitations}](#)

Added (FAAM)  
Mar 30, 2019 1:07 PM • You  
✖ Reject ✓ Accept

Changed in order to resol... (show all) to due to the accura... (show all)  
Apr 8, 2019 3:31 PM • You  
✖ Reject ✓ Accept

Added, with the notable exceptions of Canada... (show all)  
Apr 22, 2019 4:52 PM • You  
✖ Reject ✓ Accept

Changed However, n to N  
Apr 22, 2019 4:54 PM • You  
✖ Reject ✓ Accept

Added -1  
Apr 8, 2019 3:32 PM • You  
✖ Reject ✓ Accept

Changed Tonkawa, Oklahoma to Ponca City, Oklah... (show all)  
Apr 8, 2019 3:33 PM • You  
✖ Reject ✓ Accept

Changed two to six  
Apr 8, 2019 4:20 PM • You  
✖ Reject ✓ Accept

Changed on to with  
Apr 8, 2019 4:24 PM • You  
✖ Reject ✓ Accept

Changed attempts to subje... (show all) to demonstrates  
Apr 8, 2019 5:40 PM • You  
✖ Reject ✓ Accept

Changed abilities to data products  
Apr 17, 2019 2:08 PM • You  
✖ Reject ✓ Accept

Changed These events will... (show all) to These events will... (show all)  
Apr 22, 2019 3:46 PM • You  
✖ Reject ✓ Accept

Added describes a similar instrument (Parsivel... (show all)  
Apr 8, 2019 3:52 PM • You  
✖ Reject ✓ Accept

Deleted measurement  
Apr 8, 2019 3:52 PM • You  
✖ Reject ✓ Accept

Changed used to which is employed  
Apr 8, 2019 3:52 PM • You  
✖ Reject ✓ Accept

Changed Precipitation typ... (show all) to Hydrometeor type  
Apr 8, 2019 4:01 PM • You  
✖ Reject ✓ Accept

Changed precipitation typ... (show all) to hydrometeor type  
Apr 8, 2019 4:02 PM • You  
✖ Reject ✓ Accept

Changed such that to since  
Apr 9, 2019 3:30 PM • You  
✖ Reject ✓ Accept

Changed does not need to... (show all) to is not  
Apr 17, 2019 2:24 PM • You  
✖ Reject ✓ Accept

Changed ;to with Marc Hilleb... (show all)  
Apr 8, 2019 3:27 PM • You  
✖ Reject ✓ Accept

Deleted \ref{case\_studies}  
Mar 30, 2019 12:29 PM • You  
✖ Reject ✓ Accept

Deleted As with optical probes aboard aircraft w... (show all)  
Apr 8, 2019 1:54 PM • You  
✖ Reject ✓ Accept



175  
176  
177 [\cite{Tapiador2016}](#) performed a physical experiment with 14 laser disdrometers (Parsivel-1) placed in close proximity (within 6 mSA2S) on the roof of a building in Toledo, Spain. Precipitation characteristics were calculated for one disdrometer's data, then for two instrument's combined data and so on until all 14 disdrometer's data were used. The aim was to test how many disdrometer's data were needed for the precipitation parameters to asymptote towards a stable value. It was found that a single disdrometer could underestimate instantaneous rain rate by 70%. [\cite{Tapiador2016}](#) proposed that large drops contribute disproportionately to the rain rate and that instantaneous measurements have a lower chance of measuring large drops because they are sparsely populated. The DiVen disdrometers have a shortest temporal resolution of 1 minute which alleviates some of the sampling issues by allowing time for larger droplets to be observed.

178  
179 hydrometeor type observations are less affected by the aforementioned sample size limitations as the dominant type can be estimated from a relatively small sample of the total precipitation. Theoretically only one hydrometeor needs to be sampled by the disdrometer to determine hydrometeor type. The hydrometeor type accuracy is only as good as the diameter and fall speed measurements. In reality, the accuracy of the diameter and fall velocity measurements for a single particle are not accurate enough to determine the dominant hydrometeor phase from an instantaneous measurement. Furthermore, the fall velocity and diameter of small hydrometeors may be indistinguishably similar for several hydrometeor types when observed by the disdrometer. Similar to the results of [\cite{Smith2016}](#) for rainfall rate, the largest particles also give the strongest indication of hydrometeor type. This is because fall velocity is related to the density of the particle multiplicatively [\cite{gunn1949}](#), i.e. the difference in fall speed for a 5 mm raindrop and a 5 mm snow aggregate is large compared with the difference between a 0.5 mm raindrop and 0.5 mm ice crystal. Therefore the disdrometer can determine with greater confidence the type of hydrometeor when the hydrometeors are larger.

180  
181 If the sample size of the instrument were larger and thus could count more particles at a faster rate, other limitations would occur. The instrument relies on observing one particle in the beam at any given time; the optical intensity of the beam must return to normal (no obstruction) for maximum confidence of speed observations. If two hydrometeors partially overlap vertically as they fall through the beam, the disdrometer will observe a double dipped reduction in optical intensity which the signal processor must account for. Similarly for diameter, if two hydrometeors fall through the beam simultaneously, the disdrometer will observe a hydrometeor twice as large at the same speed. The sample area is thus limited to reduce the possibility of overlapping particles. Again, Figure 1 in [\cite{Loffler-Mang2000}](#) is an excellent diagram to aid the understanding of this limitation.

182  
183 The chance of two drops being in the disdrometer at the same time is unlikely except in extremely high precipitation rates. To examine this, a Poisson distribution test is applied using the sampling volume of the disdrometer with increasing drop concentrations. Figure [\ref{fig:poisson\\_test}](#) shows that precipitation rates of greater than 10,000 drops min<sup>-1</sup> are required before the probability of simultaneous drops in the beam occurring becomes non-negligible. There is a 0.09% chance of 2 or more drops in the beam simultaneously for 10<sup>4</sup> drops min<sup>-1</sup> observed by the disdrometer; 1 in every 1,075 drops. For a 10<sup>5</sup> drops min<sup>-1</sup> observed by the disdrometer there is a 7% chance of 2 or more drops in the beam simultaneously; 1 in every 14 drops. For context, a drop count of 12,000 observed by a disdrometer located at NFARR Atmospheric Observatory, Chilbolton, England in March 2017 (see section [\ref{violent\\_rain}](#)) was equivalent to 22 mm hr<sup>-1</sup>. Rain rates approaching 100 mm hr<sup>-1</sup> would be necessary for the chance of 2 drops existing in the beam simultaneously to be non-negligible. Such rainfall rates are extremely rare in the UK.

184  
185  
186  
187 - [\section{Description of the Network}\label{description}](#)  
188 - [\subsection{DiVen Locations}](#)  
189 Disdrometers have similar site specification requirements as other precipitation instruments. Ideally a flat site with no tall objects or buildings nearby that can cause shadowing, and steps taken to minimise the splash of liquid droplets from the surrounding ground into the instrument. To this end, This recommends that the instrument be mounted on a 1.5 m pole above a grassy surface. A grassy surface also minimises convective upwelling from solar heating of the ground - a particular problem for concrete surfaces - which can slow hydrometeor fall speeds and create turbulence. Turbulence from buildings should also be avoided if possible since it acts to break larger particles into smaller particles, resulting in skewed drop size distributions.

190  
191 The locations chosen for DiVen cover a variety of geophysical conditions such as mountain peaks, valleys and flat regions, as well as inland and coastal sites. The locations also cover the full breadth of the climatology of precipitation totals and hydrometeor types in the UK [\cite{Fairman2015}](#) with sites in wetter (Wales) and drier (East Anglia) regions as well as sites in warmer (southern England) and colder (northern Scotland) climates.

192  
193 The typical range at which the Met Office radar HCA product will need to perform is <math>\leq 120\text{ km}</math> (maximum range used to produce surface rainfall rate composite). For the disdrometers to be representative when verification work is performed, the instruments in DiVen are located at varying ranges from Met Office radars. Figure [\ref{fig:DiVen\\_Map}](#) shows the DiVen site locations and the Met Office radar locations for comparison. Table [\ref{Tab:locations}](#) gives an overview of each site in DiVen, including the coordinates, height a.m.s.l. and terrain characteristics.

194  
195  
196  
197 Two instruments are located 10 m apart at NFARR Atmospheric Observatory in Chilbolton. These two instruments form part of an extended observational period of 12 months where their performance will be assessed against several other precipitation sensors located at the same site. A separate paper will be produced to address the results of this dual-instrument study.

198  
199  
200  
201 - [\subsection{Installation}](#)  
202 The main installation campaign occurred in February 2017 for 9 instruments. The Holme Moss site was installed shortly after in March, followed by Cairngorm and Feshie in June 2017. Dunkswell is a Met Office installed site which was added to the network via a Raspberry Pi with 3G dongle being appended in July 2017. The last instrument to be installed was at Coverhead Estate in the Yorkshire Dales in December 2017, as a collaboration with [Water@Leeds](http://water.leeds.ac.uk) [\url{http://water.leeds.ac.uk}](http://water.leeds.ac.uk).

203  
204 Installation took around 2 hours at each site and consisted of: anchoring the tripod to the ground; attaching the disdrometer and data logging box; plugging the disdrometer cables into the power strip and the Raspberry Pi; cutting the power strip cable to length for the site. The installation was designed to be 'as plug and play as possible'. Wiring of plugs, data and power cables onto the disdrometer and coding of the Raspberry Pi were all completed in a lab before arriving at the site.

205  
206  
207  
208 - [\subsection{DiVen Costs and Environmental Impact}](#)  
209 Each site required the following components to support the disdrometer: Davis Instruments <sup>textregistered</sup> tripod (\pounds100, [\url{http://www.davisnet.com/product\\_documents/weather/manuals/07395-299\\_tm\\_07716.pdf}](http://www.davisnet.com/product_documents/weather/manuals/07395-299_tm_07716.pdf)); IP67-rated box (\pounds25, [\url{http://www.timeguard.com/products/safety/weathersafe-outdoor-power/outdoor-multi-connector-box}](http://www.timeguard.com/products/safety/weathersafe-outdoor-power/outdoor-multi-connector-box)); Raspberry Pi 3 Model B (\pounds30, [\url{https://www.raspberrypi.org/products/raspberry-pi-3-model-b/}](https://www.raspberrypi.org/products/raspberry-pi-3-model-b/)) and a generic RS-485 to USB converter (\pounds12). Therefore the total cost per site for hardware was \pounds167. 200 m of power/data cable and tools required for the installation cost an additional \pounds270 and \pounds60 respectively. Some sites rely on a 3G dongle to upload data. The dongles themselves were free when purchased with a single-use data allotment. The total cost of hardware and equipment to build DiVen amounted to \pounds2,500.

210

Deleted **This paper focuses on the hydrometeor ty...** (show all)  
Apr 8, 2019 3:11 PM • You  
 Reject  Accept

Changed **precipitation typ...** (show all) to hydrometeor type  
Apr 8, 2019 4:02 PM • You  
 Reject  Accept

Changed **precipitation typ...** (show all) to hydrometeor type  
Apr 8, 2019 4:02 PM • You  
 Reject  Accept

Changed **precipitation typ...** (show all) to hydrometeor type  
Apr 8, 2019 4:02 PM • You  
 Reject  Accept

Changed **snow aggregate to ice crystal**  
Mar 30, 2019 12:30 PM • You  
 Reject  Accept

Changed **lets to s**  
Apr 8, 2019 6:26 PM • You  
 Reject  Accept

Deleted **3**  
Apr 8, 2019 6:28 PM • You  
 Reject  Accept

Deleted **2**  
Apr 8, 2019 6:28 PM • You  
 Reject  Accept

Deleted **\ref{ease\_studies}**  
Mar 30, 2019 12:31 PM • You  
 Reject  Accept

Deleted **Cairngorm Ski Centre is situated in a va...** (show all)  
Apr 8, 2019 1:51 PM • You  
 Reject  Accept

Changed **the to several**  
Apr 8, 2019 1:50 PM • You  
 Reject  Accept

Deleted **,which represent every possible method...** (show all)  
Apr 8, 2019 1:50 PM • You  
 Reject  Accept

Changed **the to this**  
Apr 8, 2019 1:51 PM • You  
 Reject  Accept

211 The Thies Clima instrument is power rated at a maximum of 750 mA @ 230 V. No typical usage has been measured but should the maximum be continuous, then the annual consumption would be 1,500 kWh per year, or  $\pounds 190$  p.a. at average UK electricity costs (valid March 2018). In reality the power consumed is subjectively known to be much less than the maximum rating.

212

213 Most sites use existing networks at their sites for uploading data to the NCAS server, but those with 3G dongles have an ongoing cost of  $\pounds 75$  per year for a yearly data plan. There are 8 sites using 3G dongles hence the ongoing annual cost is  $\pounds 600$ .

214

215 The emissions from the first 2,300 mile journey in a diesel van were approximately 966 kg of CO<sub>2</sub> and 1.74 kg of NO<sub>x</sub> + PMS (nitrogen oxides + particulate matters). Ongoing power consumption for 13 sites (the Drùim nam Bò (Feshie) site is powered off-grid by solar and wind) at the aforementioned maximum rating would be 7,150 kg of CO<sub>2</sub> annually (using the UK average of 0.367 kg kWh<sup>-1</sup>, valid October 2017). In reality the power consumption is less and the UK average kg kWh<sup>-1</sup> is gradually decreasing over time. Computational energy consumed by DiVen is near-unquantifiable; the data hosting, processing and analysis were carried out on shared systems (National Centre for Atmospheric Science server, JASMIN server), so the fractional consumption is difficult to estimate.

216

217

218

219 - `\subsection{Data Acquisition and Management}\label{data_management}`

220 The disdrometer data is read through a serial port by a Raspberry Pi which executes a Python script to receive and digest the Telegram 4 format data. The Python code performs file management with timestamps taken from the Raspberry Pi internal clock (set over IP) and backs up files to a memory card into a directory specific to the date. Separate programming triggers the uploading of new files in the 'today' directory to an NCAS server every 5 minutes over SFTP. At 01 UTC each day, the Raspberry Pi attempts to upload any remaining files in the directory of the previous day. At 02 UTC each day, the Raspberry Pi attempts to upload files from the directory for 7 days ago as a backup command in the event that no connection could be made at the time. Only new files that do not already exist on the NCAS server are uploaded to avoid duplication. The entire directory of data for a single day is compressed using tar gunzip. 8 days after it is recorded. A support script exists to keep the processing and uploading scripts running and self-regulating. The support script checks that the processing script is running; if not, it will issue a command to start the processing script again. This means that the data acquisition script will be reattempted if an exit error occurs. In the event of a power loss the Raspberry Pi will startup and initiate all of the required scripts itself when power is restored, without user intervention.

221

222 Each disdrometer produces 3.2 MB of ASCII .txt files per day but this can be compressed significantly. 10 years of continuous minute-frequency disdrometer data (5.3 million minutes) can be compressed to as small as 400 MB.

223

224

225

226 - `\subsection{Open Access Website}`

227 Data is uploaded to an NCAS server every 5 minutes. One minute after the upload, plotting scripts are initiated. An additional minute later, a quicklook system indexes the target directories for new images and displays them on the public website.

228 The public website can be accessed here: `\url{https://sci.ncas.ac.uk/diven/}`. Data can currently be downloaded from NCAS upon request to the lead author. At the end of the first DiVen deployment phase (early 2020) all data collected by DiVen will be archived into netCDF at the Centre for Environmental Data Analysis (CEDA).

229

230

231

232 - `\subsection{DiVen Users}`

233 Although the data from DiVen will be used for radar verification, there are many other uses for the data. Several stakeholders have used DiVen data. Met Office operational forecasters are able to see live hydrometeor type data and compare with numerical weather prediction forecasts to adjust their guidance. Second, there are some research projects at the University of Leeds being carried out. This includes research on DSD characteristics in bright band and non-bright band precipitation, calibration work with the NCAS X-band polarimetric (NXP01) radar in Cumbria, England for the Environment Agency (EA) and flood forecasting research with the Water@Leeds project. Other institutions have used DiVen data also; The University of Dundee and the Scottish Environment Protection Agency (SEPA) are conducting work on snow melt and the University of Reading may use DSD information from the Reading University Atmospheric Observatory (RUAO) disdrometer to study aerosol sedimentation rates. Finally, the wind turbine manufacturer Vestas have used annual DSD data to evaluate models of blade-tip drag to improve turbine efficiency. The applications of disdrometer data are broad and cover many fields. The authors intend that this publication combined with the open accessibility of data will inspire new uses of DiVen observations.

234

235

236

237 - `\subsection{Performance of DiVen in the First Year}`

238 Figure `\ref{fig:uptime}` shows the uptime of each site in DiVen in the order that they were installed. Generally the uptime of the network has been good for the period shown, with most sites uploading more than 95% each day. A few sites have not been as good but this was mostly anticipated. In particular the Drùim nam Bò site at 900m a.m.s.l. in the Scottish Highlands has poor upload percentages. 3G signal is weak at the site and a signal booster was added in January 2018. Furthermore the site is powered by a small wind turbine and solar panel, which became rimed in ice during the winter (Figure `\ref{fig:rime}`). Although these issues were anticipated, the site was still chosen because it can provide cases of solid hydrometeors nearly all year round, in a terrain which is notoriously difficult for radar performance. Radar hydrometeor classification will be particularly difficult at this location and thus the site will provide a 'worst-case scenario' for radar HCA verification work.

239

240 Holme Moss is a remote site at relatively high altitude and uses satellite broadband which has been somewhat unreliable, however the amount of data stored on the Raspberry Pi may be higher than depicted in Figure `\ref{fig:uptime}` which was created based from data successfully uploaded to the NCAS server. Furthermore, the data is being archived on the University of Manchester's system at Holme Moss and this is known to be a much more complete dataset, which will be transferred to the NCAS servers in the future.

241

242 There were several unanticipated downtime periods. Weybourne had to be moved for construction work at the field site and was without power for approximately 1 month in March 2017. In late April 2017, the NCAS server blacklisted all disdrometer IP addresses and these had to be manually whitelisted. This was detected and resolved within 8 days. The 7-day backup upload filled in the majority of the missing data but the 8th day prior to the issue being fixed was never reattempted because of the design of the code discussed in Section `\ref{data_management}`.

243

244 The largest unanticipated downtime occurred in September 2017. An issue arose with the disdrometers being unable to record any new data, in the order that they were installed. 2 GB of free space remained on the SD cards, however there was a (previously unknown) limit to the number of files that can be saved to certain card formats irregardless of the space remaining. The issue was fixed by the creation of a new script which merged old files together. The script had to be added to all of the Raspberry Pis in the network. The issue was detected after the first 4 DiVen disdrometer installations failed sequentially, so the failure of other sites in the network was anticipated and mitigated. This can be seen on Figure `\ref{fig:uptime}` as a stepped-failure starting with the Chilbolton 1 instrument in September 2017.

245

246 Some further issues occurred which were avoidable. Laurieston was disconnected from power whilst closing the datalogger box after the installation which meant it was offline for the first 2 months until the site could be visited again. Similarly during the Dunkseswell installation in July 2017 the serial data cable was damaged which could not be fixed until November 2017. The Raspberry Pi at Lancaster was not reconnected after the aforementioned file number problem in September 2017.

247

248 Although several problems have arisen with the Disdrometer Verification Network in the first 12 months, the network manager and site owners have been, on the whole, quick to respond to these issues which has minimised downtime. DiVen is in an ideal state for long-term data collection as it has been designed with few potential failure points and with several backup methods in place in the event of a failure.

249

250

Changed precipitation typ...  
 (show all) to hydrometeor type  
 Apr 8, 2019 4:02 PM • You

251

252 - \section{Case Studies}\label{case\_studies}

253 The following sections subjectively analyse the skill of the disdrometer instrument for classifying hydrometeor type. Three types are discussed here: snow from named winter storm Doris; an intense rainfall event at NFARR Atmospheric Observatory and a graupel shower at the Reading University Atmospheric Observatory. NFARR Atmospheric Observatory instrument data were sourced from \cite{Chilbolton\_JWD} and \cite{Chilbolton\_PWS100}.

254

255 - \subsection{Rain-Snow Transition}\label{doris}

256 During the first disdrometer installation trip in February 2017, the Met Office-named winter storm Doris impacted the UK. The disdrometer at Lancaster was installed on 22nd February, and Edinburgh was scheduled for installation on 24th February. Storm Doris was forecast to bring heavy snowfall to the central belt of Scotland on the morning of the 23rd. Therefore a decision was made to leave Lancaster early on the evening of the 22nd, to arrive in Gladhouse Reservoir before the expected snowfall. An opportunity arose to temporarily operate a disdrometer at Gladhouse Reservoir (55.7776, -3.1173). Observations began at 01:00 UTC, by which time light rain had begun precipitating.

257

258 The opportunistic observations made during storm Doris provide a unique dataset by which to evaluate the skill of the disdrometer for prescribing hydrometeor type. Several transitions between rain and snow occurred that were also observed by a qualified meteorologist. The following section compares the disdrometer present weather codes and the eyewitness observations taken by the lead author during the event. An important consideration is the fact that the disdrometer was setup in a suboptimal observing environment which had approximately 200% of tall objects in close proximity. Figure \ref{fig:gladhouse\_map} shows the instrument operating at Gladhouse Reservoir. There were tall evergreen trees to the east and west, and a two-floor building to the south. Telecoms cables were also overhead and associated poles are visible to the NNE behind the disdrometer in Figure \ref{fig:gladhouse\_map}. This was unavoidable given the impromptu circumstances of deployment.

259

260 Despite the suboptimal observing conditions, the disdrometer performed well at diagnosing the correct present weather code during the storm Doris event. Table \ref{Tab:Doris\_Obs} and Figure \ref{fig:doris\_HCA} show that the disdrometer correctly output a present weather code of rain initially, followed by an unverified 'mixed precipitation' from 01:24 to 01:50. From 01:50 onwards a consistent snowfall PW code was observed, which agrees with visible observations made within 01:50-03:55. At 03:55 the precipitation became light and was described as drizzle by the disdrometer.

261

262 From 06:00 onwards the precipitation intensified and the present weather code changed between drizzle and rain. By 06:45 the PW code was switching between only rain and a rain/snow mix. From 07:24 onwards the present weather code was constant snow, which continued with varying intensity until 15:28. The eyewitness observation at 15:39 is of individual ice crystals which the disdrometer perceived as low precipitation rates of 0.293 mm hr<sup>-1</sup> misclassified as drizzle. Weak precipitation continued until 17:13 where no precipitation is observed by the disdrometer, concluding the IOP.

263

264 Table \ref{Tab:Doris\_Obs} shows that the Thies LPM has good skill with regard to determining the present weather type. Every disdrometer-diagnosed present weather code is in agreement with the eyewitness observations throughout the IOP, with the exception of 15:39. The difference in fall velocity between drizzle particles and individual ice crystals is small and as such the disdrometer struggled to identify the precipitation correctly.

265

266 Figures \ref{fig:doris\_hca\_1} and \ref{fig:doris\_hca\_2} show the periods of constant hydrometeor type observed by the disdrometer in Figure \ref{fig:doris\_HCA}, normalised for particle count. There are clear differences between rain, snow and rain/snow mix periods. Rain follows the curve shown by \cite{Gunn1949}. The rain/snow mix periods in b) and f) retain the Gunn-Kinzer relationship but with additional, larger particles with slower fall velocities. The snow categories in c) and g) are markedly different with broader distributions of particle size and a shifted fall velocity distribution. The drizzle and ice crystal periods however, are very similar. Both are characterised by distributions of particle fall speed and diameter peaking at approximately 1.4 m s<sup>-1</sup> and 0.375 mm respectively. The distribution similarities of drizzle and pristine ice crystals on Figures \ref{fig:doris\_hca\_1} and \ref{fig:doris\_hca\_2} illustrates the difficulty in distinguishing between these two types by fall speed and diameter alone, without additional information. A temperature sensor added to the disdrometer may have aided the PW code classification. The misidentification described here is not a major concern since pristine ice crystal precipitation is a) uncommon in the UK and b) contributes negligible amounts to total rainfall as indicated during this event.

267

268 The present weather code quality index shown in Figure \ref{fig:doris\_HCA} demonstrates that the Thies LPM is able to detect when recording conditions are challenging. The PW code quality index decreases, showing a poor quality measurement, during times of weak precipitation rates and in mixed precipitation phases.

269

270 The opportunistic data collected in the storm Doris event is unusual in its number of transitional periods and will be a valuable case by which to compare the performance of radar-derived surface hydrometeor classification schemes.

271

272 - \subsection{Intense Convective Rainfall}\label{violent\_rain}

273 Storm Doris also brought an interesting event to another site; a high rainfall rate observed by the NFARR Atmospheric Observatory pair of disdrometers (Chilbolton 1 & 2). The event was synoptically characterised by a narrow swath of intense precipitation oriented meridionally. The high intensity precipitation moved west to east across the UK, associated with a cold front originating from the low associated with named winter storm Doris. 30 km NE of NFARR Atmospheric Observatory in Stratfield Mortimer, a private weather station managed by Stephen Burt also observed the intense band of rainfall (personal communication, 20th October 2017). A high-resolution Lambrecht gauge (recorded resolution of 0.01 mm) on the site observed a 75.6 mm hr<sup>-1</sup> rain rate over 10 seconds at 07:51 UTC. The 1-minute rain rate at 07:51 was 54.6 mm hr<sup>-1</sup> and the 5-minute rain rate ending 07:52 was 30.6 mm hr<sup>-1</sup>. The event was described by a trained observer as 'rain quickly became heavy then torrential'.

274

275 The event was particularly outstanding from a DiVen point of view due to the drop count measured by the Thies LPMs situated at NFARR Atmospheric Observatory, Chilbolton, which peaked at around 12,000 drops in a single minute (200 per second) at 07:39 UTC on 23rd February 2017. Both disdrometers observed a similar evolution of drop count over the short 26-minute rainfall event. This does not prove that the instruments are recording accurately; conversely it may be a signal of a systematic issue with the measurement technique used in every Thies LPM.

276

277 Figure \ref{fig:heavy\_DSD\_DVD} shows an anomalously large left-tailed DSD from both of the Thies LPMs when compared against the Joss Waldogge RD-80 and Campbell Scientific PWS100 disdrometers. A high concentration of small drop sizes suggests that splashing is occurring, where larger drops breakup on impact with either the instrument itself, or the surroundings. Earlier versions of the Thies LPM did not have shields on top of the sensor, which the manufacturer acknowledged were added because of splashing issues. It is possible that in very high rainfall rates, splashed droplets are still reaching the instrument beam and are being erroneously recorded. The drop velocity distribution (DVD) from the Thies LPM is also in disagreement with the PWS100. The PWS100 uses a similar optical technique to the Thies LPM with the addition of having 4 vertically stacked beams versus 1 on the Thies LPM, which should increase the accuracy of fall velocity measurements. Furthermore, the Thies LPM categorises the highest velocity particles into the smallest diameter particle bins, which is unphysical. Finally, the total drop count per metre is significantly higher for both of the Thies LPMs.

278

Changed precipitation typ... (show all) to hydrometeor type Apr 8, 2019 4:02 PM • You

Reject  Accept

Deleted! Mar 30, 2019 12:36 PM • You

Reject  Accept

Added -derived surface Apr 8, 2019 6:37 PM • You

Reject  Accept

Changed nominal to recorded Mar 30, 2019 12:13 PM • You

Reject  Accept

Added of Mar 30, 2019 12:13 PM • You

Reject  Accept

Deleted 0 Mar 30, 2019 12:13 PM • You

Reject  Accept

Deleted Mar 30, 2019 12:38 PM • You

Reject  Accept



279 The DVD during the event is very wide. A noteworthy observation from the Stratfield Mortimer observatory is the wind characteristics. Marking the passage of the cold front at 07:45, winds became increasingly gusty and 10-minute wind mean ending 07:40 was 20 knots. A strong surface wind is associated with turbulent eddies which have some vertical component. The intermittent vertical wind acts to widen the drop velocity distribution. Furthermore, turbulence breaks up droplets thus skewing the drop size distribution. Finally, winds tangent to the beam (N-S oriented beam, westerly wind) as was the case here, increase the number of beam-edge hits which reduce the quality of the data.

280

281 Figure \ref{fig:heavy\_RR} shows that the two Thies LPMs have good agreement for rain rate from 07:25 to 07:35 where the rain rates are moderate, but that the Thies LPMs overestimate the rainfall during 07:35 to 07:40 where the rain rate is heavy. In total, Chilbolton 1 and Chilbolton 2 recorded 120% and 149% of the rainfall measured by the PWS100. The JWD is expected to underestimate slightly due to the range of observable diameters (0.3 mm to 5 mm) being smaller than true raindrop sizes, and smaller drop sizes being undetectable in the presence of large droplets due to sensor oscillation.

282

283 It appears that in these conditions the hydrometeors were not correctly measured by the Thies LPM. However, the hydrometeor type is still correctly identified despite these shortcomings in rain rate, particle diameter and particle velocity.

284

285 \subsection{Graupel Shower}

286 Graupel (rimed ice crystals) are important signatures of convection for the UK, where hail is relatively uncommon. The Thies instrument does not have a graupel category because the category does not exist within the WMO Table 4680 which it uses to convey hydrometeor type. Codes 74, 75, 76 (light / moderate / heavy soft hail / ice grains) are presumed to be equivalent to what is commonly described as graupel.

287

288 On the 25th April 2017 a shower containing conical-shaped graupel passed over Reading University between 16:30 and 16:45 UTC as observed by Dr Chris Westbrook (personal communication, 25th April 2017). Figure \ref{fig:ruao\_HCA} shows the temporal evolution of hydrometeor type identified by the DiVen instrument during the event. The disdrometer observed only a single minute (16:36) of 'soft hail / ice grains' PW code (indicating graupel) during the entire 21 minutes of precipitation detected. Between 16:30 and 16:50 UTC inclusively, the following codes were also observed: 7 minutes of code 68 (moderate / heavy rain and / or drizzle with snow); 12 minutes of codes 61 / 62 (light / moderate rain); 1 minute of code 72 (moderate snow fall). Clearly the instrument struggled to diagnose graupel in this particular event.

289

290 Figure \ref{fig:ruao\_grids} shows the particle size and velocity information grouped by hydrometeor type prescribed by the Thies LPM. Throughout the graupel shower the instrument observed a bimodal distribution in both velocity and diameter for all hydrometeor types which is indicative of both rain and graupel precipitating simultaneously. Furthermore in the rain/snow, snow, and graupel periods, a few hydrometeors exist below the Gunn-Kinzer curve which are misidentified as snow. Although the accumulated drop characteristics for the rain and rain/snow minutes are indicative of a rain/graupe mixture, in a single minute only a few particles may fall through the disdrometer beam versus several hundred raindrops. The ratio of rain to graupel may therefore be insufficient for the PW code to change to graupel. No PW code exists in the WMO Table 4680 for a rain/graupe mixture or rain/ 'soft hail' mixture. The false detection of snow hydrometeors may be attributed to graupel particles bouncing off nearby surfaces or the instrument itself, slowing the fall velocity and thus appearing to the disdrometer as a lower density particle such as an ice aggregate.

291

292 For future work with DiVen data it is important to note 1-minute observations of 'soft hail / ice grain' PW codes when longer time periods are being analysed. For example, radar hydrometeor classification will be performed with DiVen data at 5-minute intervals. If in one of the five minutes soft hail or snow grains are observed, this must be highlighted. Graupel likely existed for longer than one minute but it was either not the dominant hydrometeor or the instrument was unable to correctly identify it.

293

294 \section{Summary}

295 The Disdrometer Verification Network is the largest network of laser precipitation measurements in the UK. Here we have fully described the network and discussed three specific observation cases to subjectively discuss the accuracy of the Thies LPM with a focus on hydrometeor type diagnosis.

296

297 In summary, the instruments are able to correctly identify changes between snow and rain during storm Doris even with the suboptimal observing conditions. Snow is easily detected by the disdrometer and it is also able to accurately signal a mixture of hydrometeor types when transitioning between rain and snow.

298

299 Yet, the Thies LPM appears to have difficulty with measuring heavy rainfall events, where droplet breakup may be occurring due to instrument design. Distributions of drop size are skewed, such that small particle counts are significantly enhanced when compared with the Joss Waldvogel RD-80 and the Campbell Scientific PWS100. The hydrometeor type variable was unaffected by the distribution discrepancies in the case studied.

300

301 The Thies LPM also struggled to detect graupel in the event studied here. This shortcoming can be somewhat compensated for by flagging individual minutes of present weather codes 74, 75 and 76 within larger datasets but there will be graupel cases that the Thies LPM fails to detect entirely.

302

303 A factor affecting the Thies LPM for hydrometeor classification is that empirical relationships do not account for instrument errors or the design of the instrument which may interfere with the precipitation being measured. The hydrometeor type signatures should be derived using data from the instrument to which they will be applied. Furthermore, by using the present weather code to describe hydrometeor type, the Thies LPM is restricted in its ability to express the true nature of the observations being made, particularly noted in instances of graupel.

304

305 DiVen offers open-access data in near-real-time at 5 minute updates. 1 minute frequency data is available upon request from the authors or via the Centre for Environmental Data Analysis (CEDA) from 2020. Data has been made publicly accessible in the hope that the Disdrometer Verification Network will be used for research beyond the original scope of the network.

306

307 %% The following commands are for the statements about the availability of data sets and/or software code corresponding to the manuscript.

308 %% It is strongly recommended to make use of these sections in case data sets and/or software code have been part of your research the article is based on.

309

310 %\codeavailability{TEXT} %% use this section when having only software code available

311

312

313 \dataavailability{Data plots are available in near-real-time here: \url{https://sci.ncas.ac.uk/diven/}. Original data is available upon request to the corresponding author and will be available through the Centre for Environmental Data Analysis (CEDA) in NetCDF format in 2018.} %% use this section when having only data sets available

314

315

316 %\codedataavailability{TEXT} %% use this section when having data sets and software code available

317

318

319 %\sampleavailability{TEXT} %% use this section when having geoscientific samples available

320

321

322

323 % \appendix

324 % \section{} %% Appendix A

325

326 % \subsection{} %% Appendix A1, A2, etc.

327

Changed The fall speed of... (show all) to A strong surface... (show all)  
Apr 22, 2019 5:04 PM • You  
✖ Reject ✔ Accept

Changed precipitation typ... (show all) to hydrometeor type (show all)  
Apr 8, 2019 4:02 PM • You  
✖ Reject ✔ Accept

Changed precipitation typ... (show all) to hydrometeor type (show all)  
Apr 8, 2019 4:02 PM • You  
✖ Reject ✔ Accept

Changed precipitation typ... (show all) to hydrometeor type (show all)  
Apr 8, 2019 4:02 PM • You  
✖ Reject ✔ Accept

Changed precipitation typ... (show all) to hydrometeor type (show all)  
Apr 8, 2019 4:02 PM • You  
✖ Reject ✔ Accept

Changed 2020 to NetCDF format in... (show all)  
Apr 22, 2019 5:27 PM • You  
✖ Reject ✔ Accept

```

328 % \noappendix      %% use this to mark the end of the appendix section
329
330
331 %% Regarding figures and tables in appendices, the following two options are possible depending on your general handling of figures and tables in the
manuscript environment:
332
333 %% Option 1: If you sorted all figures and tables into the sections of the text, please also sort the appendix figures and appendix tables into the
respective appendix sections.
334 %% They will be correctly named automatically.
335
336 %% Option 2: If you put all figures after the reference list, please insert appendix tables and figures after the normal tables and figures.
337 %% To rename them correctly to A1, A2, etc., please add the following commands in front of them:
338
339 %\appendixfigures %% needs to be added in front of appendix figures
340
341 %\appendixtables %% needs to be added in front of appendix tables
342
343 %% Please add \clearpage between each table and/or figure. Further guidelines on figures and tables can be found below.
344
345
346
347 %\authorcontribution{TEXT} %% optional section
348
349 \competinginterests{The authors declare that they have no conflict of interest.} %% this section is mandatory even if you declare that no competing
interests are present
350
351 %\disclaimer{TEXT} %% optional section
352
353 %%%%%%%%%%%%%%%%%%%%%%%%%%%%%%%%%%%%%%%%%%%%%%%%%%%%%%%%%%%%%%%%%%%%%%%%%
354 % ACKNOWLEDGMENTS
355 %%%%%%%%%%%%%%%%%%%%%%%%%%%%%%%%%%%%%%%%%%%%%%%%%%%%%%%%%%%%%%%%%%%%%%%%%
356 %
357 - \begin{acknowledgements}
358 \textit{\{The lead author wishes to thank the following people and institutions for contributing to the creation of the Disdrometer Verification Network}
359
360 \textit{The United Kingdom Meteorological Office for loaning the Thies LPM instruments used in DiVeN, Thies for advice and communication regarding the
instrument, and the National Centre for Atmospheric Science (NCAS) for all other supporting hardware.}
361
362 \textit{Morwenna Cooper (Met Office), Dan Walker (NCAS), James Groves (NCAS) and Darren Lyth (Met Office) for technical advice regarding the data
acquisition design of DiVeN.}
363
364 \textit{The contacts at each site hosting a disdrometer for DiVeN: Judith Jeffery (NFARR), Andrew Lomas (University of Reading), Rebecca Carling (Facility
for Atmospheric Measurements), Grant Forster (University of East Anglia), David Hooper (NFARR), James Heath (University of Lancaster), Richard Essery
(University of Edinburgh), Geoff Monk (Mountain Weather Information Service), Michael Flynn (University of Manchester), Louise Parry (Scottish Environment
Protection Agency), Jim Cornfoot (Natural Retreats), Chris Taylor (Natural Retreats), Andrew Black (University of Dundee), Darren Lyth (Met Office), Megan
Klaar (University of Leeds), Stephen Mawle (Coverhead Farm)}
365
366 \textit{Jack Giddings, Ashley Nelis, Scott Duncan and Daniel Page for providing accommodation and sanity during the month-long installation trip.}
367
368 \textit{Philip Rosenberg (NCAS) for advice on statistical tests.}
369
370 \textit{Also: Stephen Best (Met Office), James Bowles (Met Office), Dave Hazard (NFARR), Darcy Ladd (NFARR), Stephen Burt (University of Reading), Chris
westbrook (University of Reading).}
371 \end{acknowledgements}
372
373
374
375
376 %% REFERENCES
377
378 %% Since the Copernicus LaTeX package includes the BibTeX style file copernicus.bst,
379 %% authors experienced with BibTeX only have to include the following two lines:
380 %%
381 \bibliographystyle{copernicus}
382 \bibliography{references.bib}
383 %%
384 %% URLs and DOIs can be entered in your BibTeX file as:
385 %%
386 %% URL = {http://www.xyz.org/~jones/jdx_g.htm}
387 %% DOI = {10.5194/xyz}
388
389
390 %% LITERATURE CITATIONS
391 %%
392 %% command          & example result
393 %% \citet{jones90}|  & Jones et al. (1990)
394 %% \citep{jones90}|  & (Jones et al., 1990)
395 %% \citep{jones90, jones93}| & (Jones et al., 1990, 1993)
396 %% \citep[p.~32]{jones90}| & (Jones et al., 1990, p.~32)
397 %% \citep[e.g., ]{jones90}| & (e.g., Jones et al., 1990)
398 %% \citep[e.g., ][p.~32]{jones90}| & (e.g., Jones et al., 1990, p.~32)
399 %% \citeauthor{jones90}| & Jones et al.
400 %% \citeyear{jones90}| & 1990
401

```

```

404 %% FIGURES
405
406 %% when figures and tables are placed at the end of the MS (article in one-column style), please add \clearpage
407 %% between bibliography and first table and/or figure as well as between each table and/or figure.
408
409 - \begin{figure}[t]
410 \includegraphics[width=8.3cm]{weybourne.jpg}
411 \caption{A DiVen Thies LPM located at weybourne Observatory in weybourne, East Anglia, UK, which is an Atmospheric Measurement Facility (AMF) site, part of
the National Centre for Atmospheric Science (NCAS).} \label{fig:weybourne}
412 \end{figure}
413
414 \clearpage
415
416 - \begin{figure}[t]
417 \includegraphics[width=8.3cm]{poisson_test.pdf}
418 \caption{Probability of  $SxS$  number of drops residing in within the disdrometer beam for a given drop concentration. If two or more drops are within the beam
simultaneously, data quality can be reduced. More than 12,000 drops  $mS^{(-3)}$  (equivalent to 10,000 drops min  $S^{(-1)}$  recorded by the disdrometer") are
required before the probability of 2 or more drops occurring in the beam simultaneously becomes non-negligible. As such, any events with more than 10,000
drops observed per minute should be treated as less reliable. *Drops falling through the disdrometer beam assumes a 3 m  $S^{(-1)}$  fall velocity, which from
\cite{Gunn1949} is a particle of approximately 0.8 mm diameter, typically the average size observed for a moderate rainfall event. Droplet breakup on the
housing of the Thies LPM is not factored into this test.} \label{fig:poisson_test}
419 \end{figure}
420
421 \clearpage
422
423 - \begin{figure}[t]
424 \includegraphics[width=8.3cm]{DiVen_Map.png}
425 \caption{Instrument locations that make up the Disdrometer Verification Network (DiVen) as of September 2018. Grey icons are the operational Met Office
radars as well as the Met Office research radar at wardon Hill. Map data \textcopyright2018 GeoBasis-DE/BKG (\textcopyright2009), Google, Inst. Geogr.
National.} \label{fig:DiVen_Map}
426 \end{figure}
427
428 \clearpage
429
430 - \begin{figure}[t]
431 \includegraphics[width=8.3cm]{DiVen_Data_Flow.png}
432 \caption{Flow chart of the sequence of data in the Disdrometer Verification Network. The instrument outputs a Telegram 4 format serial ping every minute,
which is then captured by a Raspberry Pi (v3) running a Python script. The Python script then saves the file to the built-in SD card as an ASCII .txt.
Separate BASH scripts upload the new files every 5 minutes (xx:05, xx:10, xx:15) to an NCAS server, which JASMIN then reads to plot the data (xx:06, xx:11,
xx:16). The website indexes for new images at xx:07, xx:12, xx:17 and so on. Thus the time taken for the xx:00 to xx:05 data to reach the website is 2
minutes.} \label{fig:DiVen_Data}
433 \end{figure}
434
435 \clearpage
436
437 - \begin{figure}[t]
438 \includegraphics[width=8.3cm]{uptime.pdf}
439 \caption{Daily upload performance of DiVen in the first 365 days of operation. Black indicates 100% upload (1440 files in a day), and white indicates 0%
upload. } \label{fig:uptime}
440 \end{figure}
441
442 \clearpage
443
444 - \begin{figure}[t]
445 \includegraphics[width=8.3cm]{rime.jpg}
446 \caption{Disdrometer at Drum nam Bo, Scotland covered in rime in January 2018. The instrument was still receiving power and recording nullified (no beam
received by optical diode) data which it interpreted as a 'sensor error' (-1) present weather code.} \label{fig:rime}
447 \end{figure}
448
449 \clearpage
450
451 - \begin{figure}[t]
452 \includegraphics[width=8.3cm]{gladhouse_map.pdf}
453 \caption{Maps, satellite images and ground images of the disdrometer location and setup for named winter storm Doris at Gladhouse Reservoir House, Scotland.
Map data \textcopyright2018 GeoBasis-DE/BKE (\textcopyright2009), Google. Satellite image: copyright © 2012-2016 Apple Inc. All rights reserved.}
\label{fig:gladhouse_map}
454 \end{figure}
455
456 \clearpage
457
458 - \begin{sidewaysfigure}[t]
459 \includegraphics[width=20.5cm]{Doris_HCA_quality_RR.pdf}
460 \caption{Rain rate, hydrometeor type, and present weather code quality index during the storm Doris event on 23rd February 2017, which occurred over
approximately 16 hours at Gladhouse Reservoir, Scotland. Rain rate is liquid equivalent for periods of snow and is recorded by a Thies LPM disdrometer.
Hydrometeor type is shown from both the disdrometer and impromptu from a trained meteorologist. The meteorologist observations at 05:00 and 07:00 UTC are
approximate due to a lack of accurate time information. The disdrometer misidentified individual ice crystals at 15:39 as drizzle.} \label{fig:doris_HCA}
461 \end{sidewaysfigure}
462
463 \clearpage
464
465 - \begin{figure}[t]
466 \includegraphics[width=12cm]{Doris_Grids_Grouped_by_Hydrometeor_1.pdf}
467 \caption{Accumulated particle information for each hydrometeor class period described in Figure \ref{fig:doris_HCA}. The centre grid shows particle counts
binned by size and fall velocity. The y-axis histogram shows particle velocity distribution (DVD) and the x-axis histogram shows particle size distribution
(DSD) for the time period described. Since the time periods between each subplot are inconsistent in length, the color scale and histograms have been
normalised for the total precipitation over each period. The periods are as follows: a) 0055-0124 (Rain) b) 0124-0150 (Rain/Snow) c) 0150-0355 (Snow) and d)
0355-0600 (Drizzle).} \label{fig:doris_hca_1}
468 \end{figure}
469

```



```

470 \clearpage
471
472 - \begin{figure}[t]
473 \includegraphics[width=12cm]{Doris_Grids_Grouped_by_Hydrometeor_2.pdf}
474 \caption{As in Figure \ref{fig:doris_hca_1}, but time periods are as follows: e) 0600-0645 (Drizzle/Rain) f) 0645-0724 (Rain/Snow) g) 0724-1528 (Snow) and
475 h) 1528-1713 (Drizzle).} \label{fig:doris_hca_2}
476 \end{figure}
477 \clearpage
478
479 - \begin{figure}[t]
480 \includegraphics[width=8.3cm]{heavy_DSD_DVD.pdf}
481 \caption{Drop characteristics of a heavy rain event at NFARR Atmospheric Observatory, Chilbolton, England on the 23rd March 2017. Distributions are
482 accumulated from 07:25 to 07:50 UTC inclusively for a 26 minute summation. The left panel shows drop size distribution and the right panel shows drop
483 velocity distribution. The Joss-waldvogel RD-80 (JWD) does not provide drop velocity information. Each instrument has been normalised for sampling area and
484 bin widths. Total drop count is listed in the top right of each plot. Both of the Thies LPMS have a higher total drop count, as well as significantly higher
485 counts of small and high velocity particles compared with the PWS and JWD. The frame of the Thies LPM may be splashing droplets into the beam leading to
486 increased counts of small, fast moving droplets.} \label{fig:heavy_DSD_DVD}
487 \end{figure}
488 \clearpage
489
490 - \begin{figure}[t]
491 \includegraphics[width=8.3cm]{heavy_RR.pdf}
492 \caption{Rain rate measured by 4 instruments during a heavy rain event at NFARR Atmospheric Observatory, Chilbolton, England on the 23rd March 2017. The
493 total accumulated rain depth over the 26 minutes for each instrument is as follows: Chilbolton 1 (1.481 mm); Chilbolton 2 (1.847 mm); PWS100 (1.237 mm); JWD
494 (1.090 mm). Each instrument has been normalised for sampling area and bin widths. Both of the Thies LPMS have a higher total rain rate than the PWS100 and
495 JWD. The difference in rain rate between both of the Thies LPMS and the PWS100 and JWD is greatest during the most intense precipitation which may be
496 evidence of droplets splashing from the instrument housing into the measuring beam.} \label{fig:heavy_RR}
497 \end{figure}
498 \clearpage
499
500 - \begin{figure}[t]
501 \includegraphics[width=8.3cm]{RUAO_HCA_Qual_RR.pdf}
502 \caption{Rain rate, present weather code quality index and hydrometeor type during a graupel shower in Reading, England, on 25th April 2017. The event was
503 recorded by a Thies LPM at the Reading University Atmospheric Observatory. Conical graupel was also observed from a nearby building (approximately 500 m
504 away) by a qualified meteorologist between 16:30 and 16:45 UTC. Rain rate is the liquid equivalent for periods of solid hydrometeors as recorded by a Thies
505 LPM disdrometer. Hydrometeor type is shown based on the present weather code (WMO Table 4680) recorded by the Thies LPM. The instrument struggles to
506 diagnose the graupel and instead outputs a present weather code of snow and mixed rain/snow precipitation.} \label{fig:ruao_HCA}
507 \end{figure}
508 \clearpage
509
510 - \begin{figure}[t]
511 \includegraphics[width=12cm]{RUAO_HCA_grids.pdf}
512 \caption{Accumulated particle information for each hydrometeor class period described in Figure \ref{fig:ruao_HCA}. The centre grid shows particle counts
513 binned by size and fall velocity. The y-axis histogram shows particle velocity distribution (DVD) and the x-axis histogram shows particle size distribution
514 (DSD) for the time period described. The periods are as follows: a) Rain (12 minutes) b) Rain/Snow (7 minutes) c) Snow (1 minute) and d) Graupel (1 minute).
515 The color scale is identical in all plots despite the different time accumulations in order to highlight the rare particles.} \label{fig:ruao_grids}
516 \end{figure}
517 \clearpage
518
519 %% ONE-COLUMN FIGURES
520
521 %%f
522 %%\begin{figure}[t]
523 %%\includegraphics[width=8.3cm]{FILE NAME}
524 %%\caption{TEXT}
525 %%\end{figure}
526 %%
527
528 %% TWO-COLUMN FIGURES
529 %%
530 %%f
531 %%\begin{figure*}[t]
532 %%\includegraphics[width=12cm]{FILE NAME}
533 %%\caption{TEXT}
534 %%\end{figure*}
535 %%
536 %%

```

```

524 %%% TABLES
525 %%%
526 %%% The different columns must be separated with a & command and should
527 %%% end with \\ to identify the column brake.
528 %
529 \clearpage
530
531 \begin{table}[t]
532 \caption{Variables output from the Thies Laser Precipitation Monitor (LPM.)}\label{Tab:var}
533 \begin{tabular}{ccccrcrc}
534 \hline\hline
535 Output & Units & & Resolution & & Range & \\
536 \hline
537 Particle Diameter & & mm & & 0.125 mm (max) & & & \geq 0.125 & - & - & 8 mm \\
538 Particle Velocity & & m s^{-1} & & 0.2 m s^{-1} (max) & & & 0 & - & - & 20 m s^{-1} \\
539 Particle Count & & Counts & & 1 Count & & & 0 & - & - & 99999 \\
540 Rainfall Rate & & mm hr^{-1} & & 0.001 mm hr^{-1} & & & 0.000 & - & - & 999.999 mm hr^{-1} \\
541 Precipitation Visibility & & m & & 1 m & & & 0 & - & - & 99999 m \\
542 Radar Reflectivity Factor & & dBZ & & 0.1 dBZ & & & -9.9 & - & - & 99.9 dBZ \\
543 PW Code Quality Index & & \% & & 1 \% & & & 0 & - & - & 100 \% \\
544 \hline
545 \end{tabular}
546 \end{table}
547
548 \clearpage
549
550 \begin{table}[t]
551 \caption{World Meteorological Organization (WMO) synoptic present weather codes (Table 4680) output by the Thies Laser Precipitation Monitor (LPM.)}\label{Tab:pw_codes}
552 \begin{tabular}{ccccrcrc}
553 \hline\hline
554 SYNOP (Tab.4680) & & Description & \\
555 \hline
556 -1 & & Sensor error & \\
557 41 & & Light / moderate unknown precipitation & \\
558 42 & & Heavy unknown precipitation & \\
559 0 & & No precipitation & \\
560 51, 52, 53 & & Light / moderate / heavy drizzle & \\
561 57 & & Light drizzle with rain & \\
562 58 & & Moderate / heavy drizzle with rain & \\
563 61, 62, 63 & & Light / moderate / heavy rain & \\
564 67 & & Light rain and / or drizzle with snow & \\
565 68 & & Moderate / heavy rain and / or drizzle with snow & \\
566 71, 72, 73 & & Light / moderate / heavy snow fall & \\
567 74, 75, 76 & & Light / moderate / heavy soft hail / ice grains & \\
568 77 & & Snow grains & \\
569 89 & & Hail & \\
570 \hline
571 \end{tabular}
572 \end{table}
573
574 \clearpage
575
576 \begin{sidewaystable*}
577 \caption{Site location descriptions of disdrometers in the Disdrometer Verification Network.}\label{Tab:locations}
578 \begin{tabular}{p{1.5cm}p{1.1cm}p{1cm}p{1.2cm}p{14cm}}
579 \hline\hline
580 Site Name & Lat/Lon & & Altitude (a.m.s.l.) & & Install Date & & Description & \\
581 \hline
582 Chilbolton & 51.1455, -1.4396 & & 83 m & & 10th Feb 2017 & & NFARR Atmospheric Observatory. 2 instruments, 10 m apart. Land type: flat, agricultural fields for > 500m in all directions. Nearby objects: 25 m diameter radar dish antenna 100 m ESE; 2-floor building 25 m SSW. \\
583 RUAG & 51.4415, -0.9376 & & 63 m & & 13th Feb 2017 & & Reading University Atmospheric Observatory. Land type: open grass in vicinity; campus with lake and trees situated within a wider suburban area. Lake 100 m W-NW, 3-floor building 50 m SSE. Shed 30 m ENE. \\
584 Cranfield & 52.0744, -0.6252 & & 105 m & & 15th Feb 2017 & & Facility for Airborne Atmospheric Measurements. Land type: 2-floor rooftop observatory within a cluster of buildings at a university airport. Nearby objects: stairwell NW, hangar ESE. Above most nearby buildings. \\
585 Weybourne & 52.9505, 1.1218 & & 8 m & & 17th Feb 2017 & & NCAS Atmospheric Measurement Facility. Land type: military base, mostly grass. Sandy beach and ocean 100 m WNE. Nearby objects: small 1-floor building ESE, 4-floor scaffold tower E. \\
586 Aberystwyth & 52.4248, -4.0045 & & 44 m & & 20th Feb 2017 & & NFARR / NERC (Natural Environment Research Council) Mesosphere-Stratosphere-Troposphere (MST) radar site. Land type: agricultural fields in a WSW-ENE valley. Nearby objects: single tree and 1-floor building SSE, hedgerow N-SSE. \\
587 Lancaster & 54.0138, -2.7749 & & 94 m & & 22nd Feb 2017 & & Hazelrigg Weather Station, university of Lancaster. Land type: agricultural fields. Nearby objects: 100 m tall wind turbine 150 m WSW, meteorological mast 10 m NW. Road and trees 30 m E. \\
588 Edinburgh & 55.9217, -3.1745 & & 105 m & & 24th Feb 2017 & & GeoSciences weather station, University of Edinburgh. Land type: roof of 6-floor James Clark Maxwell building. Urban campus W-N-E, with golf course S. Nearby objects: rooftop above all surrounding buildings. \\
589 Laurieston & 54.9614, -4.0605 & & 67 m & & 28th Feb 2017 & & Mountain Weather Information Service. Land type: rural village, undulating agricultural terrain beyond. Nearby objects: 1-floor buildings 10 m SE, trees 30 m S-W. \\
590 Holme Moss & 53.5335, -1.8574 & & 522 m & & 10th Mar 2017 & & Holme Moss transmitting station. Land type: hilltop moorland. Nearby objects: 228 m transmitting mast 40 m SW with anchoring cables overhead. Cabin 10 m SW, wire mesh fence NW-N. \\
591 Cairngorm & 57.1269, -3.6628 & & 781 m & & 12th Jun 2017 & & Cairngorm Mountain Ski Resort with Scottish Environment Protection Agency (SEPA) collaboration. Land type: arctic tundra, frequently snow-covered valley, facing NW. Nearby objects: road and power outbuilding uphill (SE) 20 m. \\
592 Feshie & 57.0063, -3.8550 & & 882 m & & 13th Jun 2017 & & Druim nam Bo weather station owned by University of Dundee. Land type: arctic tundra, frequently snow-covered, rounded mountain ridge oriented SW-NE, sloping SW. Nearby objects: weather station 10 m N. \\
593 Dunkeswell & 50.8603, -3.2398 & & 255 m & & 14th Jul 2017 & & Met office official observatory at Dunkeswell Aerodrome. Land type: flat in all directions. Runway N-E-S with surrounding agricultural fields and forest SW-N. Nearby objects: 1-floor building 20 m NW. \\
594 Coverhead & 54.2038, -1.9849 & & 316 m & & 15th Dec 2017 & & Coverhead Estate with Water@Leeds collaboration. Land type: NW slope of SW-NE valley, agricultural fields. Nearby objects: mounted on a small outhouse facing S. Telegraph pole 10 m NW and trees E-SW. \\
595 \hline
596 \end{tabular}
597 \end{sidewaystable*}
598

```

Added d  
Mar 30, 2019 12:41 PM • You

Reject  Accept

Changed d to D  
Mar 30, 2019 12:39 PM • You

Reject  Accept

Changed v to V  
Mar 30, 2019 12:39 PM • You

Reject  Accept

Changed n to N  
Mar 30, 2019 12:41 PM • You

Reject  Accept

```

599 \clearpage
600
601 - \begin{table}[t]
602 \caption{Present weather code evolution throughout the named winter storm Doris event on 23rd February 2017. All times in UTC.}\label{Tab:Doris_Obs}
603 - \begin{tabular}{p{1.9cm}p{4cm}p{1.9cm}p{3.1cm}}\color{red}{ccccrrc}
604 \hline\hline
605 Time & Disdrometer Present Weather Code & Time & Qualified Meteorologist Observation \\
606 \hline
607 00:55 to 01:24 & Rain & 00:30 to 01:05 & Rain \\
608 01:24 to 01:50 & Rain or Mixed Precipitation & & \\
609 01:50 to 03:55 & Snow & 02:31 to 02:40 & Snow \\
610 03:55 to 06:00 & Light / Moderate Drizzle & Approx. 05:00 & Drizzle \\
611 06:00 to 06:45 & Drizzle or Rain & & \\
612 06:45 to 07:24 & Rain or Mixed Precipitation & Approx. 07:00 & Mixed Precipitation \\
613 07:24 to 15:28 & Moderate / Heavy Snow & 09:49 to 14:31 & Moderate / Heavy Snow \\
614 15:28 to 17:13 & Light / Moderate Drizzle & 15:39 & Pristine Ice Crystals \\
615 \hline
616 \end{tabular}
617 \end{table}
618
619 %%% ONE-COLUMN TABLE
620 %
621 %t
622 %\begin{table}[t]
623 %\caption{TEXT}
624 %\begin{tabular}{column = 1cr}
625 %\topline
626 %
627 %\middleline
628 %
629 %\bottomline
630 %\end{tabular}
631 %\belowtable{} % Table Footnotes
632 %\end{table}
633 %
634 %%% TWO-COLUMN TABLE
635 %
636 %t
637 %\begin{table*}[t]
638 %\caption{TEXT}
639 %\begin{tabular}{column = 1cr}
640 %\topline
641 %
642 %\middleline
643 %
644 %\bottomline
645 %\end{tabular}
646 %\belowtable{} % Table Footnotes
647 %\end{table*}
648 %
649 %%% LANDSCAPE TABLE
650 %
651 %t
652 %\begin{sidewaystable*}[t]
653 %\caption{TEXT}
654 %\begin{tabular}{column = 1cr}
655 %\topline
656 %
657 %\middleline
658 %
659 %\bottomline
660 %\end{tabular}
661 %\belowtable{} % Table Footnotes
662 %\end{sidewaystable*}
663 %
664 %
665 %%% MATHEMATICAL EXPRESSIONS
666 %
667 %%% All papers typeset by Copernicus Publications follow the math typesetting regulations
668 %%% given by the IUPAC Green Book (IUPAC: Quantities, Units and Symbols in Physical Chemistry,
669 %%% 2nd Edn., Blackwell Science, available at: http://old.iupac.org/publications/books/gbook/green\_book\_2ed.pdf, 1993).
670 %%%
671 %%% Physical quantities/variables are typeset in italic font (t for time, T for Temperature)
672 %%% Indices which are not defined are typeset in italic font (x, y, z, a, b, c)
673 %%% Items/objects which are defined are typeset in roman font (Car A, Car B)
674 %%% Descriptions/specifications which are defined by itself are typeset in roman font (abs, rel, ref, tot, net, ice)
675 %%% Abbreviations from 2 letters are typeset in roman font (RH, LAI)
676 %%% Vectors are identified in bold italic font using \vec{x}
677 %%% Matrices are identified in bold roman font
678 %%% Multiplication signs are typeset using the LaTeX commands \times (for vector products, grids, and exponential notations) or \cdot
679 %%% The character * should not be applied as multiplication sign

```

```

680 %
681 %
682 %%% EQUATIONS
683 %
684 %%% Single-row equation
685 %
686 %\begin{equation}
687 %
688 %\end{equation}
689 %
690 %%% Multiline equation
691 %
692 %\begin{align}
693 %& 3 + 5 = 8 \\
694 %& 3 + 5 = 8 \\
695 %& 3 + 5 = 8
696 %\end{align}
697 %
698 %
699 %%% MATRICES
700 %
701 %\begin{matrix}
702 %x & y & z \\
703 %x & y & z \\
704 %x & y & z \\
705 %\end{matrix}
706 %
707 %
708 %%% ALGORITHM
709 %
710 %\begin{algorithm}
711 %\caption{...}
712 %\label{a1}
713 %\begin{algorithmic}
714 %...
715 %\end{algorithmic}
716 %\end{algorithm}
717 %
718 %
719 %%% CHEMICAL FORMULAS AND REACTIONS
720 %
721 %%% For formulas embedded in the text, please use \chem{}
722 %
723 %%% The reaction environment creates labels including the letter R, i.e. (R1), (R2), etc.
724 %
725 %\begin{reaction}
726 %%% \rightarrow should be used for normal (one-way) chemical reactions
727 %%% \rightleftharpoons should be used for equilibria
728 %%% \leftrightarrow should be used for resonance structures
729 %\end{reaction}
730 %
731 %
732 %%% PHYSICAL UNITS
733 %%%
734 %%% Please use \unit{} and apply the exponential notation
735 %
736 %
737 %\end{document}
738 %

```
